# Supplementary material for: Brain inflammation is accompanied by peripheral inflammation in Cstb−/− mice, a model for progressive myoclonus epilepsy
Source: PubMed Central journal article supplement (PMC5127053; doi:10.1186/s12974-016-0764-7), 2016-11-28

**A**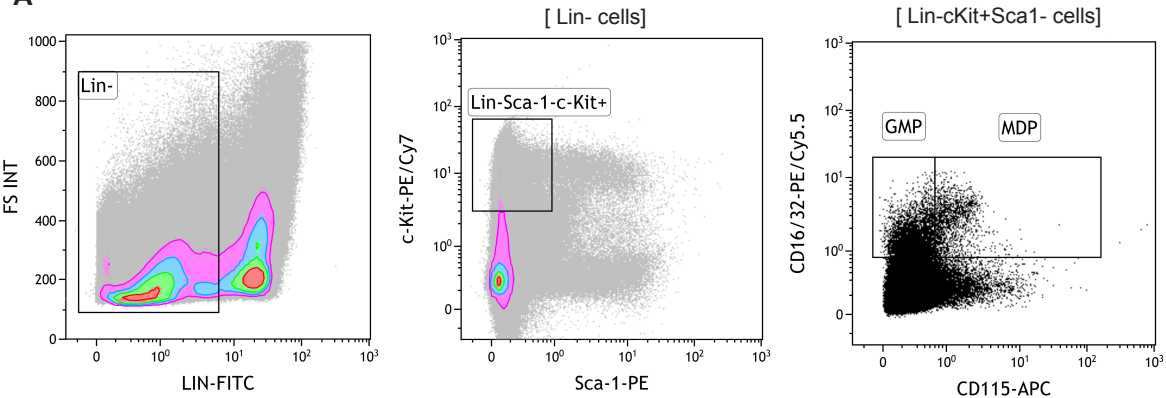**B**

granulocyte-macrophage  
progenitors (GMP)

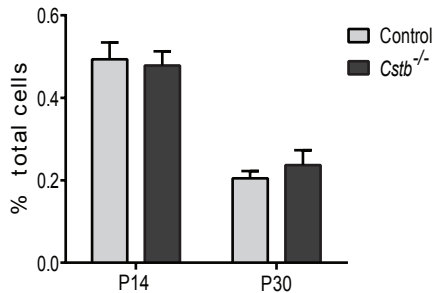**C**

macrophage-dendritic cell  
progenitors (MDP)

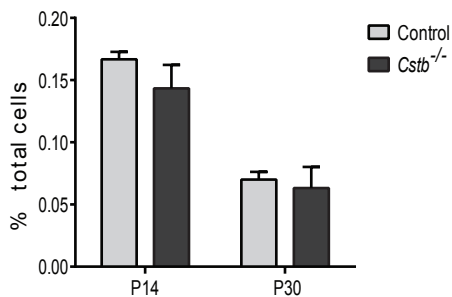

Supplement: 12974_2016_764_MOESM4_ESM.pdf [file 12974_2016_764_MOESM4_ESM.pdf]
