# Supplementary material for: Brain inflammation is accompanied by peripheral inflammation in Cstb −/− mice, a model for progressive myoclonus epilepsy
Source: Springer Nature journal article supplement (doi:10.1186/s12974-016-0764-7), 2016-11-28

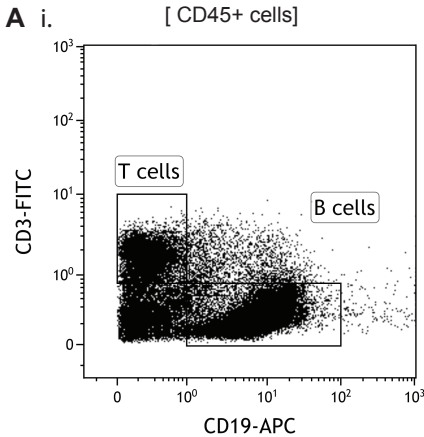

**B** B lymphocytes in P30 spleen

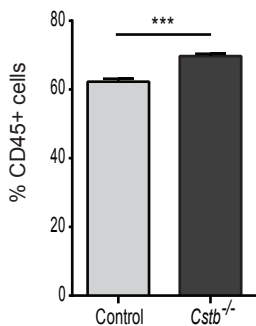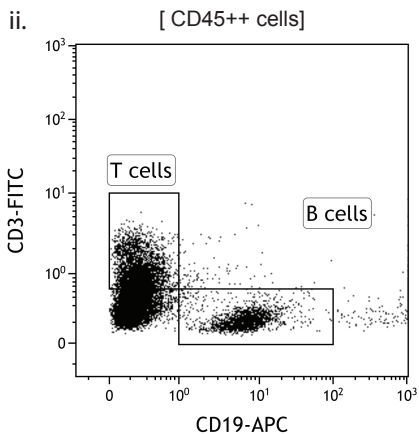

**C**

B lymphocytes in P30 brain

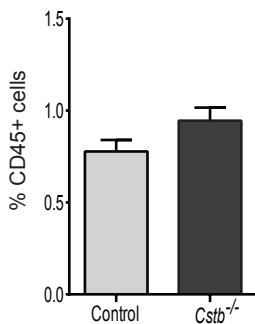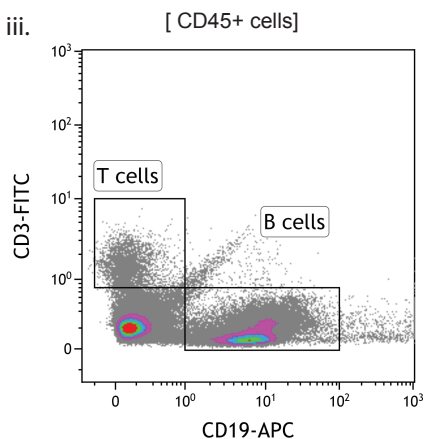

**D**

B lymphocytes in P30 bone marrow

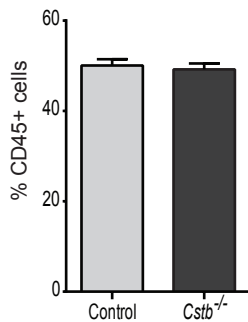

Supplement: MOESM5 [file 11100322]
